1 **RAPID COMMUNICATION PAPER**

2  
3 **Real-time measurement of E2:ER $\alpha$  transcriptional activity in living cells.**

4  
5 Manuela Cipolletti<sup>1</sup>, Stefano Leone<sup>1</sup>, Stefania Bartoloni<sup>1</sup>, Claudia Busonero<sup>1</sup>, and Filippo Acconcia<sup>1</sup>.

6  
7 Department of Sciences, Section Biomedical Sciences and Technology, University Roma Tre,  
8 Rome, Italy.

9 \* Correspondence should be addressed to Prof Filippo Acconcia, [filippo.acconcia@uniroma3.it](mailto:filippo.acconcia@uniroma3.it) at  
10 the Department of Sciences, University Roma Tre, Viale Guglielmo Marconi, 446, I-00146, Rome,  
11 Italy. Tel.: +39 0657336320; Fax: +39 0657336321.

12 **Running head:** Real-time live-measurement ER $\alpha$  activity.

13 **Keywords:**

- 14 • **17 $\beta$ -estradiol**  
15 • **Estrogen Receptor**  
16 • **Transcriptional Activity**  
17 • **Palmitoylation**  
18 • **Breast Cancer.**

19 **Total Number of Figures:** 7

20 **Data availability statement:** Research data not shared. However, the data sets used and/or  
21 analyzed during the current study are available from the corresponding author on reasonable  
22 request.

23 Contract grant sponsor: Associazione Italiana Ricerca sul Cancro AIRC, Fondo di finanziamento  
24 per le attività base di ricerca (FFABR) to FA. The Grant of Excellence Departments, MIUR  
25 (ARTICOLO 1, COMMI 314 – 337 LEGGE 232/2016) to Department of Science.

26

27 **Abstract.**

28 Kinetic analyses of diverse physiological processes have the potential to unveil new aspects of the  
29 molecular regulation of cell biology at temporal levels.  $17\beta$ -estradiol (E2) regulates diverse  
30 physiological effects by binding to the estrogen receptor  $\alpha$  (ER $\alpha$ ), which primarily works as a  
31 transcription factor. Although many molecular details of the modulation of ER $\alpha$  transcriptional  
32 activity have been discovered including the impact of receptor plasma membrane localization and  
33 its relative E2-evoked signalling, the knowledge of real-time ER $\alpha$  transcriptional dynamics in living  
34 cells is lacking. Here, we report the generation of MCF-7 and HeLa cells stably expressing a  
35 modified luciferase under the control of an E2-sensitive promoter, which activity can be  
36 continuously monitored in living cells and show that E2 induces a linear increase in ER $\alpha$   
37 transcriptional activity. Ligand-independent (*e.g.*, epidermal growth factor) receptor activation was  
38 also detected in a time-dependent manner. Kinetic profiles of ER $\alpha$  transcriptional activity measured  
39 in the presence of both receptor antagonists and inhibitors of ER $\alpha$  plasma membrane localization  
40 reveals a biphasic dynamic of receptor behaviour underlying novel aspects of receptor-regulated  
41 transcriptional effects. Finally, analysis of the rate of the dose-dependent E2 induction of ER $\alpha$   
42 transcriptional activity demonstrates that low doses of E2 induce an effect identical to that  
43 determined by high concentrations of E2 as a function of the duration of hormone administration.  
44 Overall, we present the characterization of sensitive stable cell lines where to study the kinetic of  
45 E2 transcriptional signaling and to identify new aspects of ER $\alpha$  function in different physiological  
46 or pathophysiological conditions.

47

48 **Introduction.**

49 The sex hormone 17 $\beta$ -estradiol (E2) is a critical regulator of cell physiology as it controls the  
50 homeostasis of female and male reproductive and non-reproductive tissues and organs. The  
51 pleiotropic E2 actions depend on the activation of E2 signaling. E2 signaling is triggered by the  
52 activation the estrogen receptor  $\alpha$  (ER $\alpha$ ), which works as a ligand-induced transcription factor  
53 (Busonero et al., 2019).

54 Indeed, in the nucleus, the E2:ER $\alpha$  complex activates the transcription of the genes containing  
55 the estrogen response element (ERE) sequence in their promoters. Moreover, E2 can regulate the  
56 expression of non-ERE sequence containing genes by inducing the ER $\alpha$  interaction with other  
57 transcription factors (Ascenzi et al., 2006). In addition, the regulation of ER $\alpha$  transcriptional activity  
58 can be further triggered by other hormones (*e.g.*, epidermal growth factor – EGF) in the absence of  
59 E2 (Ascenzi et al., 2006). Activation of E2:ER $\alpha$  complex gene transcription requires receptor  
60 phosphorylation on the serine (S) residue 118 (Lannigan, 2003; Le Romancer et al., 2011). The  
61 S118 ER $\alpha$  phosphorylation is a result of the E2-dependent activation of kinase cascades (*e.g.*,  
62 PI3K/AKT; ERK/MAPK), which are triggered by the plasma membrane localized ER $\alpha$  (Acconcia  
63 et al., 2005a; La Rosa et al., 2012; Pedram et al., 2007). ER $\alpha$  plasma membrane localization occurs  
64 because the receptor is palmitoylated on the cysteine (C) residue 447 by specific palmitoyl-acyl-  
65 transferases (PAT) (Acconcia et al., 2005a; Adlanmerini et al., 2014; La Rosa et al., 2012; Pedram  
66 et al., 2012; Pedram et al., 2007; Sosa et al., 2019). The ER $\alpha$  plasma membrane localization is a  
67 pre-requisite for E2-induced ER $\alpha$  transcriptional activity (La Rosa et al., 2012).

68 In the last years, diverse kinetic analyses have been performed in living cells to monitor real-  
69 time cellular responses induced by different extracellular stimuli. Measurement of growth rates of  
70 breast cancer cells treated with different hormones (*e.g.*, E2, progestins, androgens and  
71 corticosteroids) or chemicals (*e.g.*, environmental pollutants) revealed complex kinetic proliferation  
72 profiles that suggested novel mechanisms of action for each compound (Rotroff et al., 2013).  
73 Another method, which has been developed to study protein turnover, allowed to identify in a

74 quantitative time-dependent manner new kinetic mechanistic events required for protein  
75 degradation induced by proteolysis targeting chimeras (PROTACs) (Riching et al., 2018).

76 Therefore, real-time live-cell assays for measuring different parameters of cellular biology  
77 holds the potential for the identification of unrecognized biological phenomena underlying the  
78 physiological effects of extracellular stimuli (*e.g.*, hormones).

79 Remarkably, to our knowledge, the real-time kinetic evaluation of E2-induced ER $\alpha$   
80 transcriptional activity has never been reported. In turn, we decided to generate a cell line-based  
81 model system to detect the ER $\alpha$  transcriptional activity in living cells. To this purpose, we took  
82 advantage of the available technology for which the activity of a modified luciferase  
83 (nanoluciferase-PEST - NLuc) can be continuously detected in cells loaded with a non-toxic cell-  
84 permeable substrate (Hall et al., 2012) and developed MCF-7 and HeLa cell lines stably expressing  
85 an E2-responsive NLuc reporter gene construct.

86 Here, we report the characterization of ER $\alpha$  transcriptional activity in live-cells by different  
87 hormones (*i.e.*, E2 and EGF) as well as the real-time kinetic analysis of the impact of ER $\alpha$  plasma  
88 membrane localization on the E2-induced ER $\alpha$  transcriptional activity.

89

## 90 **Materials and Methods.**

91

### 92 *Cell culture and reagents.*

93 17 $\beta$ -estradiol (E2), epidermal growth factor (EGF), 4OH-tamoxifen (Tam), DMEM (with and  
94 without phenol red), fetal calf serum, charcoal stripped fetal calf serum (DCC) and the palmitoyl-  
95 acyl-transferase (PAT) inhibitor 2-bromohexadecanoic acid (2-bromo-palmitate; 2-Br) [IC<sub>50</sub> of ~4  
96  $\mu$ M] (Varner et al., 2003) were purchased from Sigma-Aldrich (St. Louis, MO). Bradford protein  
97 assay kit as well as anti-mouse and anti-rabbit secondary antibodies were obtained from Bio-Rad  
98 (Hercules, CA). Antibodies against ER $\alpha$  (F-10 mouse – for WB), pS2 (FL-84 rabbit) and cathepsin  
99 D (H75 rabbit) were obtained from Santa Cruz Biotechnology (Santa Cruz, CA); anti-vinculin

100 antibody was from Sigma-Aldrich (St. Louis, MO). All other antibodies were purchased by Cell  
101 Signalling Technology Inc. (Beverly, MA, USA). Chemiluminescence reagent for Western blotting  
102 was obtained from BioRad Laboratories (Hercules, CA, USA). Nano-Glo® Endurazine™ was  
103 purchased from Promega (Promega, Madison, MA, USA). All the other products were from Sigma-  
104 Aldrich. Analytical- or reagent-grade products were used without further purification. The identities  
105 of all the used cell lines [*i.e.*, human breast carcinoma cells (MCF-7 and T47D-1) and human cervix  
106 carcinoma cells (HeLa)] were verified by STR analysis (BMR Genomics, Italy).

107

### 108 *Plasmids and Cloning*

109 The reporter plasmid 3xERE TATA, the pcDNA flag 3.1 C, the pcDNA flag-ER $\alpha$ , the  
110 pcDNA flag-ER $\alpha$  C447A, and the pcDNA flag-ER $\alpha$  S118A were previously described (La Rosa et  
111 al., 2012). In order to generate the reporter plasmid pGL2Basic Neo\_NLucPest\_3xERE TATA  
112 containing the Nanoluciferase-PEST (NLuc) gene under the control of the 3xERE TATA promoter,  
113 the NLuc gene was first excised by the pNL2.2 (Promega, Madison, MA, USA) using KpnI/BamHI  
114 sites and cloned into the pGL2Basic Neo 3xERE TATA (a generous gift of Dr Wilson) (Wilson et  
115 al., 2004) using KpnI/BamHI sites. The resulting plasmid was the pGL2Basic Neo\_NLucPest. Next,  
116 the fragment containing the 3xERE TATA was excised by the pGL2Basic Neo 3xERE TATA cut  
117 KpnI/HindIII and cloned into the pGL2Basic Neo\_NLucPest plasmid cut KpnI/HindIII to finally  
118 generate the pGL2Basic Neo\_NLucPest\_3xERE TATA (Fig. 1).

119

### 120 *Generation of stable MCF-7 and HeLa ERE-NLuc cell lines.*

121 MCF-7 and HeLa cells were transfected with pGL2Basic Neo\_NLucPest\_3xERE TATA  
122 using lipofectamine 2000 (Thermofisher) reagent according to the manufacturer's instructions.  
123 Twenty-four hours after transfection medium was changed and the selection antibiotic was added.  
124 In particular, MCF-7 ERE-NLuc cells were generated by using G418 (500  $\mu$ g/ml) while HeLa ERE-

125 NLuc cells were generated by using G418 (750  $\mu\text{g/ml}$ ). Pooled clones were used for the  
126 experiments. Selection antibiotic was left in growing medium while each experiment was  
127 performed in the absence of antibiotic.

128

129 *Growth Curves.*

130 The xCELLigence DP system ACEA Biosciences, Inc. (San Diego, CA) Multi-E-Plate station  
131 was used to measure the time-dependent response to E2 by real-time cell analysis (RTCA). Each  
132 experimental condition was tested in quadruplicate. A detailed description of the instrument and the  
133 relative software has been previously published (Rotroff et al., 2013). Briefly, the instrument  
134 measures the electric impedance of the cells on the well surface. The software transforms the  
135 measured value of the electric impedance in an a-dimensional parameter called Cell Index (C.I.).  
136 Increased electric impedance and consequently an increased C.I. is proportional to an increase in  
137 the number of cells. C.I. normalized for each well at time 0 (*i.e.*, normalized C.I.) is the parameter  
138 used to follow cell proliferation, according to the software manufacturer's instruction. MCF-7,  
139 T47D-1 and MCF-7 ERE-NLuc cells were seeded in E-Plates 96 in growing medium. After  
140 overnight monitoring of growth once every 15 min, medium was changed, and cells were grown in  
141 1% DCC medium in the presence or in the absence of E2 (1 nM) and remained in the medium until  
142 the end of the experiment. Cellular responses were then recorded once every 15 min for a total time  
143 of 72 hours.

144 For comparison of the effect of E2 in each cell line, the ratio between the normalized cell  
145 index (NCI) (obtained by the ACEA Biosciences software) of the mean value for the E2-treated  
146 samples and the NCI of the mean value for control sample was calculated and shown as a function  
147 of time.

148

149 *Real-time measurement of NanoLucPest expression.*

150 MCF-7 ERE-NLuc cells were seeded in 96 well plates (5000 cells/well). Twenty-four hours  
151 after plating, medium was changed, and cells were grown in 1% DCC medium for 24 hours and  
152 then stimulated with E2. Each experimental condition was plated in triplicate and 3 wells were  
153 always treated with fulvestrant (ICI182,240) (Sigma Aldrich) in order to measure the basal ER $\alpha$   
154 transcriptional activity. HeLa ERE-NLuc cells were transfected with the indicated ER $\alpha$  encoding  
155 plasmids or with vector control. Twenty-four hours after transfection cells were seeded in 96 well  
156 plates (5000 cells/well) and subsequently treated as described for MCF-7 ERE-NLuc cells. Nano-  
157 Glo® Endurazine<sup>TM</sup> was added according to manufacturer's instruction in 50 $\mu$ l as final  
158 experimental volume together with ligand and/or inhibitor administration. Plates were then  
159 transferred into a Tecan Spark microplate reader (Switzerland) set to 37°C and 5% CO<sub>2</sub>. Light  
160 emission (released light units - RLU) was measured for 24 hours every other 5 minutes. For  
161 calculations, each data point was subtracted of the RLU mean value of the 3 fulvestrant treated  
162 samples at each time point. Next each value was subtracted with the value of the corresponding  
163 sample at time 0. The mean value of each experimental condition was calculated and subsequently  
164 the ratio between each experimental condition and the control condition was obtained. Each  
165 experiment was done twice in duplicate.

166

#### 167 *Western Blotting Assays.*

168 Before any cellular and biochemical assay, cells were grown in 1% DCC medium for 24  
169 hours and then stimulated with E2 at the indicated time points and doses. Cells were lysed in YY  
170 buffer (50 mM HEPES at pH 7.5, 10% glycerol, 150 mM NaCl, 1% Triton X-100, 1 mM EDTA, 1  
171 mM EGTA) plus protease and phosphatase inhibitors. Western blotting analyses were performed by  
172 loading 20-30  $\mu$ g of protein on SDS-gels. Gels were run and transferred to nitrocellulose  
173 membranes with Biorad Turbo-Blot semidry transfer apparatus. Immunoblotting was carried out by  
174 incubating membranes with 5% milk (60 min), followed by incubation o.n. with the indicated

175 antibodies. Secondary antibody incubation was continued for an additional 60 min. Bands were  
176 detected using a Biorad Chemidoc apparatus.

177

#### 178 *BrdU Incorporation.*

179 Bromodeoxyuridine (BrdU) was added in the last 30 minutes to the medium and then cells  
180 were fixed, permeabilized, and the histones were dissociated with 2 M HCl as previously described  
181 (Darzynkiewicz and Juan, 2001). BrdU positive cells were detected with an anti-BrdU primary  
182 antibody diluted 1:100 (DAKO Cytomatation) and with an anti-mouse-Alexa488 conjugated diluted  
183 1:100 (Thermofisher). Both antibodies were incubated for 1 hour at R.T. in the dark. BrdU  
184 fluorescence was measured using a CytoFlex flow cytometer and the cell cycle analysis was  
185 performed by CytExpert v1.2 software (Beckman Coulter). All samples were counterstained with  
186 propidium iodide (PI) for DNA/BrdU biparametric analysis.

187

#### 188 *Cell cycle analysis*

189 After treatments, cells were harvested with trypsin, and counted to obtain  $10^6$  cells per  
190 condition. Then, the cells were centrifuged at 1500 rpm for 5 min at 4°C, fixed with 1 ml ice-cold  
191 70% ethanol and subsequently stained with PI buffer (500 µg/ml Propidium Iodide, 320µg/ml  
192 RNaseA, in 0.1% Triton X in PBS). DNA fluorescence was measured using a CytoFlex flow  
193 cytometer and the cell cycle analysis was performed by CytExpert v1.2 software (Beckman  
194 Coulter).

195

#### 196 *Statistical analysis.*

197 A statistical analysis was performed using the ANOVA (One-way analysis of variance and  
198 Tukey's as post-test) test with the InStat version 3 software system (GraphPad Software Inc., San  
199 Diego, CA). Densitometric analyses were performed using the freeware software Image J by  
200 quantifying the band intensity of the protein of interest respect to the relative loading control band



201 (*i.e.*, vinculin) intensity. Numerosity of the experiments is given in figure texts. Data are the mean  $\pm$   
202 standard deviation. In all analyses,  $p$  values  $< 0.01$  were considered significant but for Western  
203 blotting experiments for which  $p$  values  $< 0.05$  were considered significant.

204

## 205 **Results.**

### 206 **Characterization of MCF-7 NLuc cells.**

207 Characterization of the generated MCF-7 ERE-NLuc cells was performed by evaluating the  
208 ability of E2 to induce cell proliferation (Castoria et al., 2001), S118 ER $\alpha$  phosphorylation (Ali et  
209 al., 1993), ER $\alpha$  degradation (Leclercq et al., 2006) as well as the accumulation of two well-known  
210 ERE-containing genes (*i.e.*, presenilin 2 – pS2/TFF and cathepsin D – CatD) (Sun et al., 2005).

211 Growth curves analyses indicated that E2 induced a persistent time-dependent increase in cell  
212 number in MCF-7 ERE-NLuc cells (Fig. 2A-green line). Interestingly, E2 was also able to increase  
213 the number of parental MCF-7 cells with the same kinetics (Fig. 2A-red line). As control, we also  
214 measured the ability of E2 to increase the number of T47D-1, another ER $\alpha$  expressing breast cancer  
215 cell line (Wilson et al., 2004). Figure 2A (purple line) shows that in T47D-1 cells E2 increased the  
216 cell number in a time-dependent manner, although with a different kinetics. MCF-7 ERE-NLuc  
217 cells were treated with E2 for 24 hours and cell cycle analysis was further performed. E2  
218 augmented the percentage of the cells that incorporated BrdU (Fig. 2B) and increased the number of  
219 cells in the S phase of the cell cycle (Fig. 2C) with respect to the control untreated cells. These data  
220 demonstrate that E2 induces MCF-7 ERE-NLuc DNA synthesis, cell cycle progression and cell  
221 proliferation.

222 E2-induced S118 phosphorylation of the ER $\alpha$  is required for receptor transcriptional activity  
223 (Ali et al., 1993). Therefore, we tested if E2 could trigger this receptor post-translational  
224 modification in MCF-7 ERE-NLuc cells. Time-course analyses revealed that E2 ( $10^{-9}$  M) increased  
225 the fraction of the S118 phosphorylated ER $\alpha$  in MCF-7 ERE-NLuc cells, which peaked after 30 min  
226 of E2 administration and was maintained at least for 120 min (Fig. 2D and D').

227 Because E2-induced ER $\alpha$  degradation is intrinsically connected with receptor transcriptional  
228 activity (Metivier et al., 2003; Reid et al., 2003) and we noted that E2 also determined a rapid and  
229 persistent reduction in ER $\alpha$  intracellular levels (Fig. 2D), we next evaluated the ability of E2 to  
230 trigger ER $\alpha$  degradation. Figure 2E and 2E' show that in 24 hours E2 reduced ER $\alpha$  content in MCF-  
231 7 ERE-NLuc cells in a dose-dependent manner with the maximum effect occurring already at 10<sup>-10</sup>  
232 M of E2 administration.

233 Next, we finally tested the ability of E2 to modulate the expression of the ERE-containing  
234 genes pS2/TFF and CatD. As shown in figure 3B and 3B', the levels of both pS2/TFF and CatD  
235 were increased by 24 hours of E2 treatment in MCF-7 ERE-NLuc cells in a dose-dependent manner,  
236 with the maximum effect occurring already at 10<sup>-10</sup> M of E2 administration.

237 Overall, these data indicate that the MCF-7 ERE-NLuc cells respond to E2 as expected for an  
238 E2 sensitive cell line derived from the parental MCF-7 cells.

239

#### 240 **Real-time measurement of E2-induced ER $\alpha$ transcriptional activity in living cells.**

241 To measure the E2-induced ER $\alpha$  transcriptional activity in real-time and in living cells, MCF-  
242 7 ERE-NLuc cells were loaded with the live-cell substrate Nano-Glo® Endurazine<sup>TM</sup> (Hall et al.,  
243 2012) in the presence or in the absence of different doses of E2 (from 10<sup>-12</sup> to 10<sup>-8</sup> M) and ERE-  
244 NLuc-dependent activity (*i.e.*, released light units - RLU) was measured for 24 hours every other 5  
245 minutes in a 37°C and 5% CO<sub>2</sub> controlled atmosphere (for details, please see material and methods  
246 section).

247 As shown in figure 3A, E2 induced a time-dependent increase in ERE-NLuc activity at all the  
248 tested doses with a maximal effect occurring already at 10<sup>-10</sup> M. Notably, cell treatment with 10<sup>-12</sup>  
249 M E2 was ineffective in inducing ERE-NLuc activity (Fig. 3A – purple line). On the contrary, E2-  
250 induced activation of ERE-NLuc activity occurred with the same kinetic profile but it reached a  
251 lower level of induction when 10<sup>-11</sup> M E2 was administered to MCF-7 ERE-NLuc cells (Fig. 3A –  
252 green line). To evaluate if such differences could be ascribed to a different rate of E2-induced

253 effect, we calculated the slope of the curves (*i.e.*, linear regression) obtained by cells treated with E2  
254 in our real-time time course analyses. Figure 3A' shows a dose-dependent trend in the slope of the  
255 curves relative to E2 administration. In particular, no differences were observed among the slopes  
256 of the curves that refers to the cells treated with doses of E2 ranging from  $10^{-10}$  to  $10^{-8}$  M while the  
257 slope extracted from the  $10^{-11}$  M E2-treated cells was significantly lower (Fig. 3A'). Notably, the  
258 slope of the cells treated with  $10^{-12}$  M E2 was identical to that of the control samples (Fig. 3A').

259 Next, in order to directly understand if the E2 ERE-NLuc activity correlates with the E2-  
260 induced ERE-containing gene expression, we compared the E2 dose-dependent effect on the  
261 measured ERE-NLuc activity at the single time point 24 hours (Fig. 3C – green line) with the dose-  
262 dependent increase in pS2/TFF and CatD detected in MCF-7 ERE-NLuc cells after 24 hours of E2  
263 administration (Fig. 3B and 3B'). The E2-dependent increase in both ERE-NLuc activity, pS2/TFF  
264 and CatD expression was described by a sigmoidal curve typical of the E2 effect. Remarkably, the  
265 excitatory dose 50 ( $ED_{50}$ ) calculated for ERE-NLuc activity was lower ( $ED_{50}= 5.0 \cdot 10^{-12}$ M – 5 pM)  
266 than the one calculated for Western blotting analysis of pS2/TFF and CatD cellular levels ( $ED_{50}=$   
267  $2.5 \cdot 10^{-11}$ M – 25 pM) (Fig. 3C). Therefore, the ERE-NLuc activity assay is sensitive to E2  
268 administration.

269 Additionally, we evaluated the involvement of  $ER\alpha$  in the E2-induced ERE-NLuc activity. To  
270 this purpose we administered different doses (*i.e.*, from  $10^{-7}$  to  $10^{-5}$  M) of the  $ER\alpha$  antagonist 4OH-  
271 tamoxifen (Tam) in the absence or in the presence of E2 ( $10^{-8}$  M). As shown in figure 4A, 4B and  
272 4C, the time-dependent linear E2 induction of ERE-NLuc activity was prevented in a dose-  
273 dependent manner by Tam administration. Interestingly, different doses of Tam determined  
274 different kinetic profiles in MCF-7 ERE-NLuc cells both in the presence and in the absence of E2.  
275 While treatment with Tam at  $10^{-5}$  M completely prevented ERE-NLuc activity irrespective of E2  
276 administration (Fig. 4C), lower doses of Tam (*i.e.*,  $10^{-7}$  and  $10^{-6}$  M) showed a biphasic kinetic  
277 profile both in the presence and in the absence of E2.

278 In a first phase (*i.e.*, up to 650 min about 10.8 hours), the values for Tam+E2 treated samples  
279 were significantly lower (for Tam  $10^{-7}$  M samples) than those of E2 treated samples or below the  
280 control values (for Tam  $10^{-6}$  M samples). For Tam-alone treated samples, instead, we obtained a  
281 different behavior as a function of the dose. Indeed, while for Tam  $10^{-7}$  M samples we observed an  
282 increase in ERE-NLuc activity, Tam  $10^{-6}$  M-treated samples were significantly below the control  
283 levels (Fig. 4A and 4B, respectively).

284 In a second phase, Tam administration triggered an increase in ERE-NLuc activity up to 1440  
285 min (*i.e.*, 24 hours) both in the presence and in the absence of E2 (Fig. 4A and Fig. 4B).  
286 Accordingly, the slope of the Tam curves obtained in MCF-7 ERE-NLuc cells were significantly  
287 lower than the E2 one but also significantly increased with respect to the control samples (Fig. 4D).

288 To understand if this Tam-dependent behavior was due to an artifactual measurement of ERE-  
289 NLuc activity in our stable MCF-7 cell lines, we measured the E2 effect on pS2/TFF and CatD  
290 levels in the presence of Tam ( $10^{-7}$  M) in MCF-7 ERE-NLuc cells. As shown in figure 4E and 4E',  
291 the E2-dependent increase in both ERE-NLuc activity, pS2/TFF and CatD expression was  
292 prevented by Tam administration ( $10^{-7}$  M). However, Tam alone increased the basal levels of CatD  
293 (Fig. 4E and 4E'). Notably, a similar stimulatory effect of Tam on ERE-containing genes was  
294 already scored in different cell lines (Arao et al., 2011). As expected (Busonero et al., 2019;  
295 Leclercq et al., 2006), the E2-induced degradation of ER $\alpha$  was prevented by Tam (Fig. 4E).  
296 Altogether, these results show that the E2-induced ERE-NLuc activation depends on ER $\alpha$   
297 transcriptional activity.

298 Overall, these data demonstrate that E2 induces a rapid and persistent linear increase in ER $\alpha$   
299 transcriptional activity which can be detected at low doses of E2 (*i.e.*, between  $10^{-12}$  to  $10^{-11}$  M) and  
300 can be prevented by antiestrogens (*e.g.*, Tam) and further suggest that the differences in the effects  
301 elicited by E2 at different doses could depend on the rate at which E2 induces ER $\alpha$  transcriptional  
302 activation.

303

304 **Real-time measurement of E2-independent ER $\alpha$  transcriptional activity.**

305 Next, we evaluated the ligand-independent ER $\alpha$  transcriptional activation in MCF-7 ERE-  
306 NLuc cells. To this purpose we treated cells with epidermal growth factor (EGF), which is known to  
307 induce receptor gene transcription in the absence of E2 (Ascenzi et al., 2006).

308 Because EGF-dependent ER $\alpha$  activation is weak and could be detected only under ER $\alpha$   
309 overexpression conditions (Berno et al., 2008; El-Tanani and Green, 1997), we included a negative  
310 control in our experiments by also administering E2 at  $10^{-13}$  M. As expected, E2 induced a time-  
311 dependent linear increase in ERE-NLuc activity when cells were treated at hormone dose of  $10^{-8}$  M  
312 (black line) but not when  $10^{-13}$  M E2 (orange line) was administered (Fig. 5A). Interestingly, EGF  
313 treatment also induced a time-dependent stimulation of ERE-NLuc activity (Fig. 5A). Analysis of  
314 both hormone effects on the measured ERE-NLuc activity at the time point 24 hours (Fig. 5B) and  
315 the slope of hormone-triggered ERE-NLuc activity curves (Fig. 5C) further confirmed such  
316 observations.

317 Therefore, in MCF-7 ERE-NLuc cells EGF triggers the activation of the ER $\alpha$  transcriptional  
318 function.

319

320 **Real-time measurement of the impact of ER $\alpha$  plasma membrane localization on E2-induced**  
321 **ER $\alpha$  transcriptional activity.**

322 Plasma membrane localization of the ER $\alpha$  occurs because the receptor is palmitoylated by  
323 specific palmitoyl-acyl-transferases (PATs) on the C residue 447. Inhibition of ER $\alpha$  palmitoylation  
324 by either the PAT inhibitor 2-bromo-palmitate (2-Br) or the ER $\alpha$  C447 to alanine (A) mutant  
325 (C447A) prevents receptor plasma membrane localization and E2 signaling including ER $\alpha$   
326 transcriptional functions (Acconcia et al., 2005a; Adlanmerini et al., 2014; La Rosa et al., 2012;  
327 Pedram et al., 2012; Pedram et al., 2007; Sosa et al., 2019). Therefore, we analyzed the effect of E2  
328 in MCF-7 ERE-NLuc cells in the presence of the PAT inhibitor 2-Br and further evaluated the E2-  
329 triggered ERE-NLuc activity of the C447A mutant in transfected HeLa ERE-NLuc cells. Because

330 E2-induced ER $\alpha$  S118 phosphorylation is also required for full receptor transcriptional activity (Ali  
331 et al., 1993), we also tested the effects of E2 in ER $\alpha$  S118A mutant transfected HeLa ERE-NLuc  
332 cells.

333 As shown in figure 6A and 6B, 2-Br treatment of MCF-7 ERE-NLuc cells prevented the E2-  
334 induced effect on the ERE-NLuc activity and strongly reduced the slope of the curve derived by E2  
335 administration. Similar results were also obtained in wild type (wt) and C447A ER $\alpha$  mutant  
336 transfected HeLa ERE-NLuc cells treated with E2 (Fig. 6D and 6E). Notably, as expected for a  
337 receptor defective in S118 phosphorylation (Ali et al., 1993), the E2 kinetic profile as well as its  
338 relative slope was reduced in S118A ER $\alpha$  mutant transfected HeLa ERE-NLuc cells with respect to  
339 HeLa ERE-NLuc cells expressing the wt receptor (Fig. 6D and 6E).

340 Interestingly, we noticed a complex kinetic profile of 2Br-treated MCF-7 ERE-NLuc cells. 2-  
341 Br treatment reduced the ERE-NLuc activity below the control. Indeed, within the first 5 hours of  
342 treatment E2 was not able to trigger ERE-NLuc activation while from 5 to 24 hours of E2  
343 administration, the hormone stimulated the ERE-NLuc reporter activity (Fig. 6C). On the contrary,  
344 the measured E2-dependent ERE-NLuc activation of the C447A ER $\alpha$  mutant in transfected HeLa  
345 ERE-NLuc cells was constantly lower than the one detected in the presence of the wt receptor for  
346 the entire duration of the analysis (Fig. 6F).

347 These results confirm that ER $\alpha$  palmitoylation is required for E2-induced ER $\alpha$  transcriptional  
348 activity and further suggest that the E2-dependent activation of ER $\alpha$  plasma membrane localized  
349 receptor is necessary for both rapid and persistent activation of ER $\alpha$  transcriptional functions.

350

### 351 **Prediction of dose- and time-dependent E2 effect on ER $\alpha$ transcriptional activity.**

352 Finally, based on the slope of the transcriptional profile extracted by our E2 dose-dependent  
353 analyses in MCF-7 ERE-NLuc cells (Fig. 2A and 2B), we reasoned that the results obtained from  
354 our stable cell lines could allow to predict the time point at which different doses of E2 elicit the  
355 same ERE-NLuc activity. In turn, we first calculated the time at which each dose of E2 determines

356 a specific amount of E2 effect (Fig. 7A). On this basis, we hypothesized that 24 hours E2  
357 administration at  $10^{-11}$  M would determine a transcriptional effect equal to those elicited by 18  
358 hours E2 administration at concentration ranging from  $10^{-10}$  M at  $10^{-8}$  M, as detected in ERE-NLuc  
359 assays (Fig. 7B).

360 To verify this prediction, we treated both parental MCF-7 and MCF-7 ERE-NLuc cells with  
361 E2 at  $10^{-11}$  M for 24 hours and with E2 at both  $10^{-10}$  M,  $10^{-9}$  M and  $10^{-8}$  M for 18 hours and  
362 measured the pS2/TFF expression. As shown in figure 7C and 7C', E2 induced the same  
363 accumulation of pS2/TFF intracellular levels at all the tested doses in both parental and artificial  
364 MCF-7 cell lines. Remarkably, under these conditions E2 lost its dose-dependent effect (Fig. 3C) on  
365 the induction of pS2/TFF expression (Fig. 7D).

366 These data demonstrate that prolonged treatments of MCF-7 cells with low doses of E2  
367 induce an increase in ER $\alpha$  transcriptional activity identical to that elicited by E2 administered to  
368 cells at high concentrations, thus suggesting a critical role for time-dependent effects rather than  
369 concentration-dependent effects in the regulation of E2:ER $\alpha$  transcriptional activity.

370

## 371 **Discussion.**

372 The main aim of the present work was to identify a method allowing the measurement of ER $\alpha$   
373 transcriptional activity both in real-time and living cells. Here, we constructed a novel plasmid (*i.e.*,  
374 pGL2Basic Neo\_NLucPest\_3xERE TATA) containing neomycin resistance cassette and a  
375 nanoluciferase-PEST (NLuc) gene under the control of 3 repetition of the classical estrogen  
376 response element (ERE) (Fig. 1). The NLuc gene encodes for a modified luciferase gene engineered  
377 to be fused in frame with a PEST sequence. This fusion protein returns a high brightness than the  
378 classic luciferases and has a shorter protein half-life because of the PEST sequence. Additionally,  
379 the substrate for NLuc protein is cell permeable and non-toxic. These biochemical features render  
380 such reporter protein particularly suitable for transcriptional studies in living cells (Hall et al., 2012).

381 In turn, we generated MCF-7 and HeLa cells in which our novel plasmid was stably  
382 transfected. MCF-7 cells are ER $\alpha$  expressing cells and are considered standard “workhorses” to  
383 study E2-dependent ER $\alpha$  effects (Kao et al., 2009). On the other hand, HeLa cells do not express  
384 ER $\alpha$  and therefore do not respond to E2 unless the receptor is exogenously introduced by transient  
385 transfection (Acconcia et al., 2005b). The resulting MCF-7-ERE NLuc and HeLa-ERE NLuc stable  
386 cell lines are responsive tools to study real-time ER $\alpha$  transcriptional dynamics in living cells under  
387 different experimental conditions.

388 Initial characterization of the stable MCF-7-ERE NLuc cells revealed that E2 induces the  
389 proliferation of MCF-7-ERE NLuc cells with a kinetic identical to the one elicited by E2 in the  
390 parental MCF-7 cells. Moreover, either MCF-7 cell lines are more sensitive to E2 than the T47D-1  
391 cells, possibly because an higher level of ER $\alpha$  is present in MCF-7 cells than in T47D-1 cells  
392 (Fiocchetti et al., 2018; Kao et al., 2009). As expected for an MCF-7-derived cell lines (Dutertre  
393 and Smith, 2003; La Rosa et al., 2012; Lannigan, 2003; Leone et al., 2018; Weitsman et al., 2006),  
394 we found that the MCF-7-ERE NLuc cells respond to E2 by inducing DNA synthesis, cell cycle  
395 progression, the phosphorylation of the ER $\alpha$  on the S118 residue, the degradation of the ER $\alpha$  as  
396 well as the increase in the levels of both pS2/TFF and CatD, two classic ERE-containing E2-target  
397 genes (Sun et al., 2005). Therefore, we conclude that this novel cell line responds to E2 as the  
398 parental MCF-7 cells both in terms of cell proliferation and in terms of intracellular molecular  
399 mechanisms of the E2:ER $\alpha$  complex action.

400 The performance of the stable MCF-7-ERE NLuc cells was evaluated by measuring different  
401 parameters of the ER $\alpha$  transcriptional activity. Real-time evaluation of E2 dose-dependent effect  
402 indicated that E2 linearly induces ER $\alpha$  transcriptional activity as a function of time. Moreover, we  
403 observed that the rate of E2-dependent induction of ERE-based transcription increase in a dose-  
404 dependent manner. The excitatory dose 50 (ED<sub>50</sub>) at a single time point (24 hours) following E2  
405 exposure was approximately 5 pM. Notably, these results are similar to those obtained in T47D-1  
406 cells stably transfected with different standard luciferase reporter genes, where the measured ED<sub>50</sub>



407 for E2 at 24 hours was 6 pM (Legler et al., 1999) or 3 pM (Wilson et al., 2004). Interestingly, the  
408 fact that the ED<sub>50</sub> for E2 at 24 hours for pS2/TFF and CatD measured by means of Western blotting  
409 analysis is 25 pM demonstrates that ERE-based assays are more sensitive to variations in ER $\alpha$   
410 transcriptional activity. Accordingly, although the ligand-independent transcriptional activation of  
411 the ER $\alpha$  by EGF is weak and could be detected only in cells overexpressing the receptor (Berno et  
412 al., 2008; El-Tanani and Green, 1997), we were able to profile the temporal dynamics of the EGF-  
413 induced ER $\alpha$  transcriptional activity also in endogenously expressing ER $\alpha$  cells.

414 Time-dependent E2-induced ER $\alpha$  transcriptional activity was prevented by Tam in MCF-7-  
415 ERE NLuc cells. Indeed, the rate of E2-transcriptional induction was strongly reduced in the  
416 presence of Tam. However, analysis of the time-dependent transcriptional profile of Tam-treated  
417 MCF-7-ERE NLuc cells identified a biphasic kinetic both in the presence and in the absence of E2.  
418 Tam is the prototype selective estrogen receptor modulator (SERM). It works by binding to the ER $\alpha$   
419 and inhibiting its transcriptional activity through receptor structural modifications (Brzozowski et  
420 al., 1997). In our real-time live-cell analyses, we observed a first phase in which the ER $\alpha$   
421 transcriptional activity was reduced at all the tested doses. However, at later time points, ER $\alpha$   
422 transcriptional activity was stimulated by Tam although the E2 effect was reduced for low doses of  
423 Tam (*i.e.*, 10<sup>-7</sup> M) and completely abolished for high doses of Tam (*i.e.*, 10<sup>-6</sup> and 10<sup>-5</sup> M).  
424 Accordingly, although the E2 effect in inducing the expression of CatD and pS2/TFF was reduced,  
425 CatD but not pS2/TFF basal expression levels were increased by Tam (10<sup>-7</sup> M). Although this  
426 discrepancy is difficult to reconcile, it is however possible to speculate that different E2-target  
427 genes have different sensitivity to E2 administration because they respond to a different amount of  
428 active/inactive ER $\alpha$  (please see below). Indeed, basal Tam-dependent ER $\alpha$  activation could be  
429 ascribed to the ability of Tam to induce an accumulation in ER $\alpha$  intracellular levels (Busonero et  
430 al., 2019; Leclercq et al., 2006). The increased number of ER $\alpha$  molecules would compensate for the  
431 inhibitory effect of Tam but only at later time points. On the contrary, the inhibition of receptor  
432 transcriptional activity is immediate and consistent with the ability of Tam to bind ER $\alpha$  and to

433 induce an antagonist receptor conformation in a time-frame compatible with those of  
434 ligand:receptor association (Brzozowski et al., 1997). This potential biochemical mechanism  
435 appears to be supported by the fact that high doses of Tam (*i.e.*,  $10^{-5}$  M) do not show a biphasic  
436 kinetic profile and completely prevent the basal and E2-induced ER $\alpha$  transcriptional activity.  
437 However, the observed stimulatory activity of Tam on ER $\alpha$  transcriptional activity is consistent  
438 with already reported observations (Arao et al., 2011).

439 Real-time analysis of the impact of ER $\alpha$  plasma membrane localization on E2-induced ER $\alpha$   
440 transcriptional activity showed that the rate of this process was strongly dampened in cells in which  
441 ER $\alpha$  palmitoylation was prevented. More interestingly, the ER $\alpha$  transcriptional activity showed a  
442 biphasic kinetic profile in MCF-7-ERE NLuc cells treated with the PAT inhibitor. Inhibition of ER $\alpha$   
443 palmitoylation results in an inhibition of the E2-induced extra-nuclear signaling which are required  
444 for the activation of receptor transcriptional activity and for the completion of many different E2-  
445 dependent physiological functions both in cell lines and *in vivo* (Acconcia et al., 2005a;  
446 Adlanmerini et al., 2014; La Rosa et al., 2012; Pedram et al., 2012; Pedram et al., 2007; Sosa et al.,  
447 2019). Our time-dependent live-cell analyses confirm that the contribution of the rapid signaling  
448 pathways originating from the activation of the ER $\alpha$  at the plasma membrane is critical for full  
449 receptor transcriptional activity. However, data presented here further demonstrate that besides  
450 being a pre-requisite for the rapid initial stages of E2-induced ER $\alpha$  transcriptional activation (La  
451 Rosa et al., 2012), the E2:ER $\alpha$  plasma membrane signaling is also absolutely required for the  
452 prolonged effect of ER $\alpha$  as a ligand-induced transcription factor. In support to this notion, the time-  
453 dependent kinetic profile of E2-induced transcriptional activity of the palmitoylation defective ER $\alpha$   
454 C447A mutant measured in HeLa-ERE NLuc cells was completely flat. Therefore, we conclude that  
455 the plasma membrane localization of the ER $\alpha$  is necessary and sufficient for the induction of the  
456 receptor transcriptional activity both for rapid and prolonged times of E2 administration.

457 Finally, we predicted the time-dependent transcriptional behavior of different doses of an ER $\alpha$   
458 ligand. Indeed, we have calculated the time required for different E2 concentrations to reach the

459 same transcriptional effects and effectively reported that treatments with different E2 concentrations  
460 at different time points of both MCF-7-ERE NLuc and parental MCF-7 cells produced the same  
461 increase in pS2/TFF expression. Physiological blood concentration of E2 fluctuates in healthy pre-  
462 menopausal woman between picomolar and nanomolar concentrations. However, the peak of E2  
463 concentration in blood lasts for a maximum time of 48-72 hours. This peak is however sufficient to  
464 induce all the physiological uterine modifications (Zittermann et al., 2000). Our results suggest that  
465 rather than the chronic exposure to E2, the time of E2 administration is critical to achieve the  
466 maximal ER $\alpha$  transcriptional activity. In this respect, the pulsatile nature of E2 action under  
467 physiological conditions would support such concept. However, future investigations are required  
468 to establish if short E2 treatments could lead to fully and prolonged activation of ER $\alpha$  action.

469 In conclusion, we report a method to study the real-time kinetics of E2:ER $\alpha$  transcriptional  
470 activity in living cells using the generated MCF-7-ERE NLuc and HeLa-ERE NLuc stable cell  
471 lines. Here, we only measured the classic parameters of the E2 signaling (*i.e.*, ligand-dependent and  
472 independent functions; the impact of ER $\alpha$  antagonists and of receptor plasma membrane  
473 localization) on ER $\alpha$  transcriptional activity in MCF-7-ERE NLuc or in HeLa-ERE NLuc cells.  
474 Nonetheless, our stable cell lines are suitable for diverse analyses. MCF-7-ERE NLuc cells can be  
475 easily used for drug discovery by setting up high-throughput screenings for the identification of  
476 novel ER $\alpha$  antagonists with specific kinetic profiles. In addition, these cell lines could facilitate the  
477 analysis of the transcriptional effects elicited by known or unknown endocrine disruptors or  
478 environmental contaminants that bind ER $\alpha$  and have a weak estrogenic activity. In this respect, the  
479 use of a real-time live-cell assay could be an advantage in understanding complex dose-dependent  
480 effects of such receptor ligands (*e.g.*, U-shaped curves) (Acconcia et al., 2016; Acconcia et al.,  
481 2015; Marino et al., 2012). MCF-7-ERE NLuc cells are also in principle suitable for the analysis of  
482 the physiological involvement of a specific protein on the regulation of E2:ER $\alpha$  transcriptional  
483 activity (*e.g.*, single or high-throughput screening with siRNA oligonucleotides). On the other hand,  
484 HeLa-ERE NLuc cells are transfectable with different kinds of ER $\alpha$  (or ER $\beta$ ) deletion or point

485 mutants and can be used to connect ER $\alpha$  (or ER $\beta$ ) structural biochemical determinants with receptor  
486 transcriptional activity. Finally, this experimental model could be applied to other nuclear receptors  
487 (*e.g.*, ER $\beta$ , androgen receptor, glucocorticoid receptor) enlarging our knowledge on the dynamic of  
488 nuclear receptor transcriptional activity and its modulation by different endogenous or exogenous  
489 ligands.

490 Therefore, these stable cell lines represent new models for the real-time live-cell analysis of  
491 the kinetic aspects of E2 signaling under physiological or pathophysiological conditions.

492

#### 493 **Author contribution statement.**

494 M.C. performed most of the work (generation of stable cell lines; real-time live cell  
495 experiments; most of Western blotting analyses); S.L. performed all cell cycle analyses. S.B. and  
496 C.B. generated the expression vectors required for transfection and performed some of Western  
497 blotting analyses. M.C., S.L., S.B. and C.B. to figure preparation and manuscript proof-reading.  
498 F.A. designed the research and wrote the paper.

499

#### 500 **Acknowledgments.**

501 The research leading to these results has received funding from AIRC under IG 2018 - ID.  
502 21325 project – P.I. Acconcia Filippo. This study was also supported by grants from Ateneo Roma  
503 Tre and Fondo di finanziamento per le attività base di ricerca (FFABR) to FA. The Grant of  
504 Excellence Departments, MIUR (ARTICOLO 1, COMMI 314 – 337 LEGGE 232/2016) to  
505 Department of Science, University Roma TRE is also gratefully acknowledged. The Authors  
506 declare no conflict of interest.

507

#### 508 **Figure Captions.**

509

510 **Figure 1. The pGL2Basic Neo\_NLucPest\_3xERE TATA plasmid.**

511 Schematic of the produced plasmid map used to generate the MCF-7 and HeLa ERE-NLuc stable  
512 cell lines. Important genetic determinants and restriction enzymes are indicated.

513

514 **Figure 2. E2 sensitivity of the MCF-7 ERE-NLuc stable cell lines.**

515 (A) Growth curves analysis of MCF-7 (red line), MCF-7 ERE-NLuc (green line) and T47D-1  
516 (purple line) cells treated with E2 ( $10^{-9}$  M) for 72 hours. Measurement of cell index (C.I.) has been  
517 detected every 15 minutes with the xCelligence DP device; for details, please see the method  
518 section. Graph shows the E2 effect on C.I. (*i.e.*, cell number) calculated for each cell line at each  
519 time point with respect to its relative control cells (grey line). The data are the means of two  
520 different experiments in which each sample was measured in quadruplicate (for details please see  
521 the material and method section). Bromodeoxyuridine (BrdU) incorporation (squares in the plot  
522 indicate the BrdU positive events detected by the cytofluorimeter) (B) and cell cycle profile (C) of  
523 MCF-7 ERE-NLuc cells treated with E2 ( $10^{-9}$  M) for 24 hours. Western blotting (D) and relative  
524 densitometric analyses (D') of S118 phosphorylated (pS118) ER $\alpha$  and ER $\alpha$  expression levels in  
525 MCF-7 ERE-NLuc cells treated with E2 at the indicated time points ( $10^{-9}$  M); data are the means of  
526 three different experiments. Western blotting (E) and relative densitometric analyses (E') of ER $\alpha$   
527 expression levels in MCF-7 ERE-NLuc cells treated with E2 for 24 hours at the indicated doses;  
528 data are the means of three different experiments. The loading control was done by evaluating  
529 vinculin expression in the same filter. \* indicates significant differences with respect to the CTR or  
530 0 sample. All experiments were performed in triplicates. Data are the mean  $\pm$  standard deviations  
531 with a p value < 0.05.

532

533 **Figure 3. Kinetic analysis of E2 effect in MCF-7 ERE-NLuc stable cell lines.**

534 (A) Profile and (A') relative linear regression (Slope) of ERE-NLuc activity detected in MCF-7  
535 ERE-NLuc cells treated with the indicated doses of E2 in the presence of the live-cell substrate  
536 Nano-Glo® Endurazine<sup>TM</sup>. Released light units (RLU) was measured for 24 hours every other 5

537 minutes in a 37°C and 5% CO<sub>2</sub> controlled atmosphere. Graph shows the E2 effect calculated at each  
538 time point with respect to its relative control sample. The data are the means of three different  
539 experiments in which each sample was measured in triplicate (for details please see the material and  
540 method section). Western blotting (B) and relative densitometric analyses (B') of pS2/TFF (red  
541 line) and cathepsin D (CatD) (orange line) expression levels in MCF-7 ERE-NLuc cells treated with  
542 E2 for 24 hours at the indicated doses; data are the means of three different experiments. The  
543 loading control was done by evaluating vinculin expression in the same filter. (C, green line) ERE-  
544 NLuc activity detected in MCF-7 ERE-NLuc cells treated with the indicated doses of E2 for 24  
545 hours. \* indicates significant differences with respect to the 0 sample; ° indicates significant  
546 differences with respect to the 10<sup>-10</sup> – 10<sup>-8</sup> M E2-treated samples. Data are the mean ± standard  
547 deviations with a p value < 0.01.

548

549 **Figure 4. The role of 4OH-tamoxifen on the kinetic analysis of E2 effect in MCF-7 ERE-NLuc**  
550 **stable cell lines.**

551 Profile of ERE-NLuc activity detected in MCF-7 ERE-NLuc cells treated with E2 (10<sup>-8</sup> M) and the  
552 live-cell substrate Nano-Glo® Endurazine<sup>TM</sup> in the presence or in the absence of different doses of  
553 4OH-tamoxifen (Tam): Tam 10<sup>-7</sup> M (panel A), Tam 10<sup>-6</sup> M (panel B) and Tam 10<sup>-5</sup> M (panel C).  
554 (D) Linear regression (Slope) relative to real-time measurement of ERE-NLuc activity as depicted  
555 in panel A, B and C. Released light units (RLU) was measured for 24 hours every other 5 minutes  
556 in a 37°C and 5% CO<sub>2</sub> controlled atmosphere. Graph shows the E2 effect calculated at each time  
557 point with respect to its relative control sample. The data are the means of three different  
558 experiments in which each sample was measured in triplicate (for details please see the material and  
559 method section). Western blotting (E) and relative densitometric analyses (E') of pS2/TFF (red  
560 bars), cathepsin D (CatD) (orange bars) and ERα expression levels in MCF-7 ERE-NLuc cells  
561 treated with E2 (10<sup>-8</sup> M) in the presence or in the absence of 4OH-tamoxifen (Tam - 10<sup>-7</sup> M) for 24  
562 hours; data are the means of three different experiments. The loading control was done by

563 evaluating vinculin expression in the same filter. \* indicates significant differences with respect to  
564 the – sample; ° indicates significant differences with respect to the E2-treated samples. # indicates  
565 significant differences with respect to the Tam-treated samples. Data are the mean ± standard  
566 deviations with a p value < 0.01 for panel (D) and p < 0.05 for panel (E’).

567

568 **Figure 5. The kinetic analysis of EGF effect in MCF-7 ERE-NLuc stable cell lines.**

569 (A) Profile and (C) relative linear regression (Slope) of ERE-NLuc activity detected in MCF-7  
570 ERE-NLuc cells treated with EGF or E2 at the indicated doses and the live-cell substrate Nano-  
571 Glo® Endurazine™. Released light units (RLU) was measured for 24 hours every other 5 minutes  
572 in a 37°C and 5% CO<sub>2</sub> controlled atmosphere. Graph shows the E2 effect calculated at each time  
573 point with respect to its relative control sample. The data are the means of three different  
574 experiments in which each sample was measured in triplicate (for details please see the material and  
575 method section). (B) ERE-NLuc activity detected in MCF-7 ERE-NLuc cells treated with EGF or  
576 E2 at the indicated doses for 24 hours. \* indicates significant differences with respect to the 0  
577 sample. Data are the mean ± standard deviations with a p value < 0.01.

578

579 **Figure 6. The role of ERα palmitoylation on the kinetic analysis of E2 effect in MCF-7 and**  
580 **HeLa ERE-NLuc stable cell lines.**

581 Profile and relative linear regression (Slope) of ERE-NLuc activity detected in the presence of the  
582 live-cell substrate Nano-Glo® Endurazine™ either MCF-7 ERE-NLuc cells treated with E2 (10<sup>-8</sup>  
583 M) in the presence or in the absence of 2-bromopalmitate (2-Br - 10<sup>-5</sup> M) (A, B) or in HeLa ERE-  
584 NLuc cells transfected with the pcDNA flag-ERα wild type (wt), the pcDNA flag-ERα C447A and  
585 the pcDNA flag-ERα S118A and treated with E2 (10<sup>-8</sup> M) (D, E). Released light units (RLU) was  
586 measured for 24 hours (for MCF-7 ERE-NLuc) and for 12 hours (for HeLa ERE-NLuc) every other  
587 5 minutes in a 37°C and 5% CO<sub>2</sub> controlled atmosphere. Graph shows the E2 effect calculated at  
588 each time point with respect to its relative control sample. The data are the means of two different

589 experiments in which each sample was measured in triplicate (for details please see the material and  
590 method section). (C) ERE-NLuc activity detected in MCF-7 ERE-NLuc cells treated with E2 ( $10^{-8}$   
591 M) in the presence or in the absence of 2-bromo-palmitate (2-Br -  $10^{-5}$  M) or (F) in HeLa ERE-  
592 NLuc cells transfected with the pcDNA flag-ER $\alpha$  wild type (wt), the pcDNA flag-ER $\alpha$  C447A and  
593 the pcDNA flag-ER $\alpha$  S118A and treated with E2 ( $10^{-8}$  M) at the indicated time points. \* indicates  
594 significant differences with respect to the – sample; ° indicates significant differences with respect  
595 to the E2-treated samples (for MCF-7 ERE-NLuc cells) or to the E2-treated samples in wt ER $\alpha$  (for  
596 HeLa ERE-NLuc cells). # indicates significant differences with respect to the 2Br-treated samples  
597 (for MCF-7 ERE-NLuc cells) or to the – samples in C447A ER $\alpha$  mutant samples (for HeLa ERE-  
598 NLuc cells). Data are the mean  $\pm$  standard deviations with a p value < 0.01.

599

600 **Figure 7. The role of E2 doses and time of E2 administration on ER $\alpha$  transcriptional activity**  
601 **in MCF-7 cells.**

602 (A) Time required for E2 dose-dependent induction of ERE-NLuc activity in MCF-7 ERE-NLuc  
603 cells. (B) ERE-NLuc activity detected in MCF-7 ERE-NLuc cells treated with E2 at the indicated  
604 doses for the indicated times. Western blotting (C, C') and relative densitometric analyses (D) of  
605 pS2/TFF expression levels in MCF-7 (C, red line in D) and in MCF-7 ERE-NLuc cells (C', green  
606 line in D) treated with E2 at the indicated doses for the indicated times; data are the means of three  
607 different experiments. The loading control was done by evaluating vinculin expression in the same  
608 filter. \* indicates significant differences with respect to the – sample. All experiments were  
609 performed in triplicates. Data are the mean  $\pm$  standard deviations with a p value < 0.01 for panel (B)  
610 and p < 0.05 for panel (D).

611

612 **References.**

613



- 614 Acconcia F, Ascenzi P, Bocedi A, Spisni E, Tomasi V, Trentalance A, Visca P, Marino M. 2005a.  
615 Palmitoylation-dependent estrogen receptor alpha membrane localization: Regulation by 17  
616 beta-estradiol. *Molecular Biology of the Cell* 16(1):231-237.
- 617 Acconcia F, Fiocchetti M, Marino M. 2016. Xenoestrogen regulation of ERalpha/ERbeta balance in  
618 hormone-associated cancers. *Mol Cell Endocrinol*.
- 619 Acconcia F, Pallottini V, Marino M. 2015. *Molecular Mechanisms of Action of BPA*. Dose-  
620 response : a publication of International Hormesis Society 13(4):1559325815610582.
- 621 Acconcia F, Totta P, Ogawa S, Cardillo I, Inoue S, Leone S, Trentalance A, Muramatsu M, Marino  
622 M. 2005b. Survival versus apoptotic 17beta-estradiol effect: role of ER alpha and ER beta  
623 activated non-genomic signaling. *J Cell Physiol* 203(1):193-201.
- 624 Adlanmerini M, Solinhac R, Abot A, Fabre A, Raymond-Letron I, Guihot AL, Boudou F, Sautier L,  
625 Vessieres E, Kim SH, Liere P, Fontaine C, Krust A, Chambon P, Katzenellenbogen JA,  
626 Gourdy P, Shaul PW, Henrion D, Arnal JF, Lenfant F. 2014. Mutation of the palmitoylation  
627 site of estrogen receptor alpha in vivo reveals tissue-specific roles for membrane versus  
628 nuclear actions. *Proc Natl Acad Sci U S A* 111(2):E283-290.
- 629 Ali S, Metzger D, Bornert JM, Chambon P. 1993. Modulation of transcriptional activation by  
630 ligand-dependent phosphorylation of the human oestrogen receptor A/B region. *EMBO J*  
631 12(3):1153-1160.
- 632 Arao Y, Hamilton KJ, Ray MK, Scott G, Mishina Y, Korach KS. 2011. Estrogen receptor alpha  
633 AF-2 mutation results in antagonist reversal and reveals tissue selective function of estrogen  
634 receptor modulators. *Proc Natl Acad Sci U S A* 108(36):14986-14991.
- 635 Ascenzi P, Bocedi A, Marino M. 2006. Structure-function relationship of estrogen receptor alpha  
636 and beta: impact on human health. *Mol Aspects Med* 27(4):299-402.
- 637 Berno V, Amazit L, Hinojos C, Zhong J, Mancini MG, Sharp ZD, Mancini MA. 2008. Activation  
638 of estrogen receptor-alpha by E2 or EGF induces temporally distinct patterns of large-scale  
639 chromatin modification and mRNA transcription. *PLoS One* 3(5):e2286.
- 640 Brzozowski AM, Pike AC, Dauter Z, Hubbard RE, Bonn T, Engstrom O, Ohman L, Greene GL,  
641 Gustafsson JA, Carlquist M. 1997. Molecular basis of agonism and antagonism in the  
642 oestrogen receptor. *Nature* 389(6652):753-758.
- 643 Busonero C, Leone S, Bartoloni S, Acconcia F. 2019. Strategies to degrade estrogen receptor alpha  
644 in primary and ESR1 mutant-expressing metastatic breast cancer. *Mol Cell Endocrinol*  
645 480:107-121.
- 646 Castoria G, Migliaccio A, Bilancio A, Di Domenico M, de Falco A, Lombardi M, Fiorentino R,  
647 Varricchio L, Barone MV, Auricchio F. 2001. PI3-kinase in concert with Src promotes the  
648 S-phase entry of oestradiol-stimulated MCF-7 cells. *EMBO J* 20(21):6050-6059.
- 649 Darzynkiewicz Z, Juan G. 2001. Analysis of DNA content and BrdU incorporation. *Current*  
650 *protocols in cytometry* Chapter 7:Unit 7 7.
- 651 Dutertre M, Smith CL. 2003. Ligand-independent interactions of p160/steroid receptor coactivators  
652 and CREB-binding protein (CBP) with estrogen receptor-alpha: regulation by  
653 phosphorylation sites in the A/B region depends on other receptor domains. *Mol Endocrinol*  
654 17(7):1296-1314.
- 655 El-Tanani MK, Green CD. 1997. Two separate mechanisms for ligand-independent activation of the  
656 estrogen receptor. *Mol Endocrinol* 11(7):928-937.
- 657 Fiocchetti M, Cipolletti M, Ascenzi P, Marino M. 2018. Dissecting the 17β-estradiol pathways  
658 necessary for neuroglobin anti-apoptotic activity in breast cancer. *Journal of cellular*  
659 *physiology* 233(7):5087-5103.
- 660 Hall MP, Unch J, Binkowski BF, Valley MP, Butler BL, Wood MG, Otto P, Zimmerman K,  
661 Vidugiris G, Machleidt T, Robers MB, Benink HA, Eggers CT, Slater MR, Meisenheimer  
662 PL, Klaubert DH, Fan F, Encell LP, Wood KV. 2012. Engineered luciferase reporter from a  
663 deep sea shrimp utilizing a novel imidazopyrazinone substrate. *ACS chemical biology*  
664 7(11):1848-1857.

- 665 Kao J, Salari K, Bocanegra M, Choi YL, Girard L, Gandhi J, Kwei KA, Hernandez-Boussard T,  
666 Wang P, Gazdar AF, Minna JD, Pollack JR. 2009. Molecular profiling of breast cancer cell  
667 lines defines relevant tumor models and provides a resource for cancer gene discovery.  
668 PLoS One 4(7):e6146.
- 669 La Rosa P, Pesiri V, Leclercq G, Marino M, Acconcia F. 2012. Palmitoylation Regulates 17beta-  
670 Estradiol-Induced Estrogen Receptor-alpha Degradation and Transcriptional Activity. Mol  
671 Endocrinol 26(5):762-774.
- 672 Lannigan DA. 2003. Estrogen receptor phosphorylation. Steroids 68(1):1-9.
- 673 Le Romancer M, Poulard C, Cohen P, Sentis S, Renoir JM, Corbo L. 2011. Cracking the Estrogen  
674 Receptor's Posttranslational Code in Breast Tumors. Endocr Rev 32(5):597-622.
- 675 Leclercq G, Lacroix M, Laios I, Laurent G. 2006. Estrogen receptor alpha: impact of ligands on  
676 intracellular shuttling and turnover rate in breast cancer cells. Curr Cancer Drug Targets  
677 6(1):39-64.
- 678 Legler J, van den Brink CE, Brouwer A, Murk AJ, van der Saag PT, Vethaak AD, van der Burg B.  
679 1999. Development of a stably transfected estrogen receptor-mediated luciferase reporter  
680 gene assay in the human T47D breast cancer cell line. Toxicol Sci 48(1):55-66.
- 681 Leone S, Busonero C, Acconcia F. 2018. A high throughput method to study the physiology of  
682 E2:ERalpha signaling in breast cancer cells. J Cell Physiol 233(5):3713-3722.
- 683 Marino M, Pellegrini M, La Rosa P, Acconcia F. 2012. Susceptibility of estrogen receptor rapid  
684 responses to xenoestrogens: Physiological outcomes. Steroids 77(10):910-917.
- 685 Metivier R, Penot G, Hubner MR, Reid G, Brand H, Kos M, Gannon F. 2003. Estrogen receptor-  
686 alpha directs ordered, cyclical, and combinatorial recruitment of cofactors on a natural target  
687 promoter. Cell 115(6):751-763.
- 688 Pedram A, Razandi M, Deschenes RJ, Levin ER. 2012. DHHC-7 and -21 are  
689 palmitoylacyltransferases for sex steroid receptors. Mol Biol Cell 23(1):188-199.
- 690 Pedram A, Razandi M, Sainson RC, Kim JK, Hughes CC, Levin ER. 2007. A conserved  
691 mechanism for steroid receptor translocation to the plasma membrane. J Biol Chem  
692 282(31):22278-22288.
- 693 Reid G, Hubner MR, Metivier R, Brand H, Denger S, Manu D, Beaudouin J, Ellenberg J, Gannon F.  
694 2003. Cyclic, proteasome-mediated turnover of unliganded and liganded ERalpha on  
695 responsive promoters is an integral feature of estrogen signaling. Mol Cell 11(3):695-707.
- 696 Riching KM, Mahan S, Corona CR, McDougall M, Vasta JD, Robers MB, Urh M, Daniels DL.  
697 2018. Quantitative Live-Cell Kinetic Degradation and Mechanistic Profiling of PROTAC  
698 Mode of Action. ACS chemical biology 13(9):2758-2770.
- 699 Rotroff DM, Dix DJ, Houck KA, Kavlock RJ, Knudsen TB, Martin MT, Reif DM, Richard AM,  
700 Sipes NS, Abassi YA, Jin C, Stampfl M, Judson RS. 2013. Real-time growth kinetics  
701 measuring hormone mimicry for ToxCast chemicals in T-47D human ductal carcinoma cells.  
702 Chemical research in toxicology 26(7):1097-1107.
- 703 Sosa LDV, Petiti JP, Picech F, Chumpen S, Nicola JP, Perez P, De Paul A, Valdez-Taubas J,  
704 Gutierrez S, Torres AI. 2019. The ERalpha membrane pool modulates the proliferation of  
705 pituitary tumours. J Endocrinol 240(2):229-241.
- 706 Sun JM, Spencer VA, Li L, Yu Chen H, Yu J, Davie JR. 2005. Estrogen regulation of trefoil factor  
707 1 expression by estrogen receptor alpha and Sp proteins. Exp Cell Res 302(1):96-107.
- 708 Varner AS, Ducker CE, Xia Z, Zhuang Y, De Vos ML, Smith CD. 2003. Characterization of human  
709 palmitoyl-acyl transferase activity using peptides that mimic distinct palmitoylation motifs.  
710 Biochem J 373(Pt 1):91-99.
- 711 Weitsman GE, Li L, Skliris GP, Davie JR, Ung K, Niu Y, Curtis-Snell L, Tomes L, Watson PH,  
712 Murphy LC. 2006. Estrogen receptor-alpha phosphorylated at Ser118 is present at the  
713 promoters of estrogen-regulated genes and is not altered due to HER-2 overexpression.  
714 Cancer Res 66(20):10162-10170.

- 715 Wilson VS, Bobseine K, Gray LE, Jr. 2004. Development and characterization of a cell line that  
716 stably expresses an estrogen-responsive luciferase reporter for the detection of estrogen  
717 receptor agonist and antagonists. *Toxicol Sci* 81(1):69-77.
- 718 Zittermann A, Schwarz I, Scheld K, Sudhop T, Berthold HK, von Bergmann K, van der Ven H,  
719 Stehle P. 2000. Physiologic fluctuations of serum estradiol levels influence biochemical  
720 markers of bone resorption in young women. *J Clin Endocrinol Metab* 85(1):95-101.  
721

# Figure 1

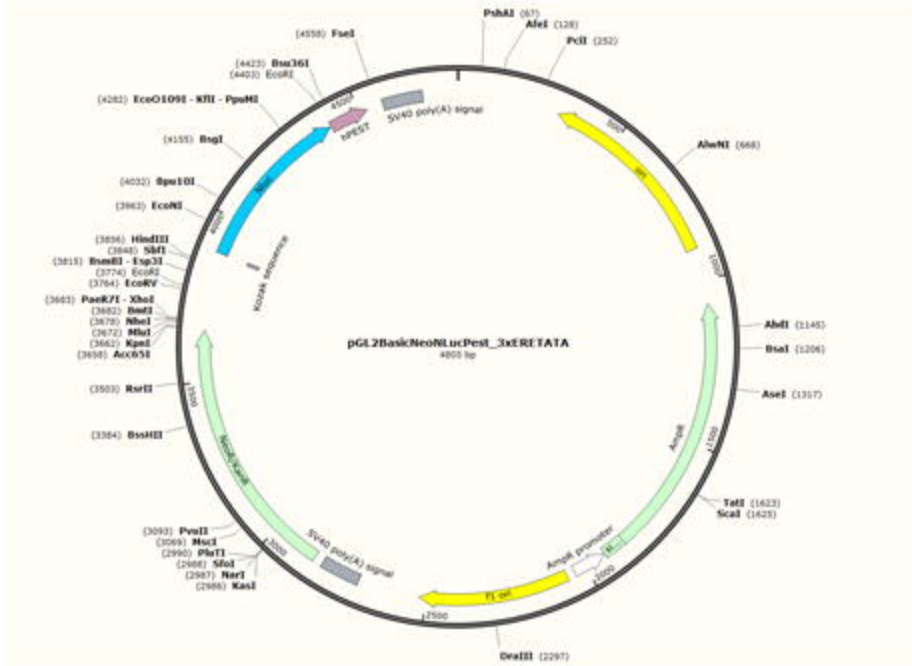

# Figure 2

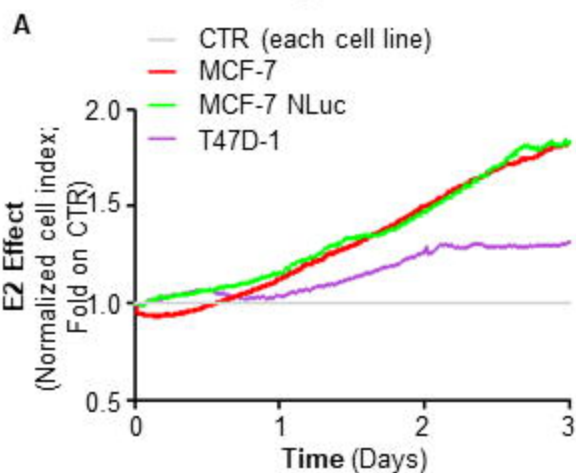

**B**

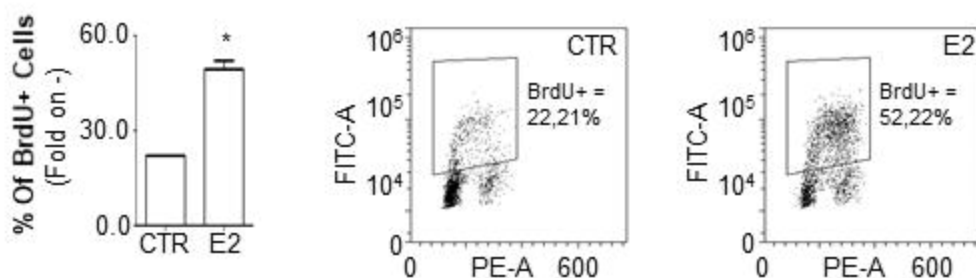

**C**

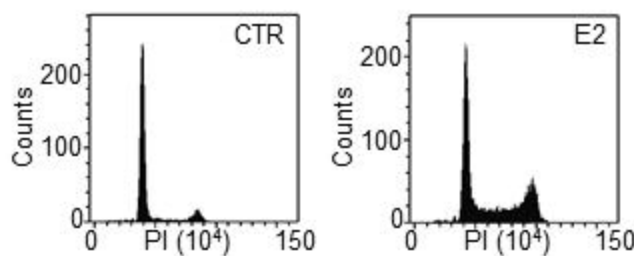

**D**

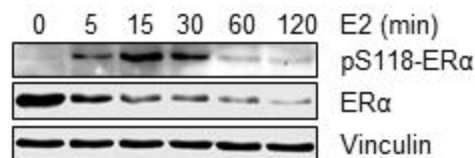

**D'**

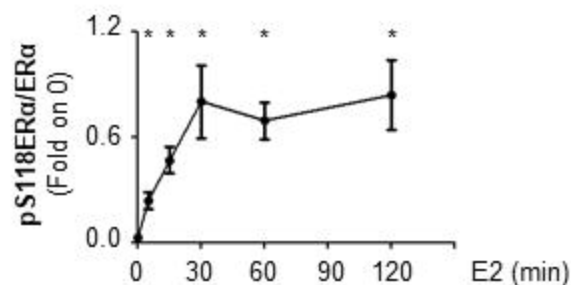

**E**

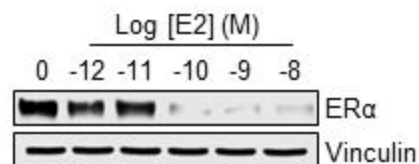

**E'**

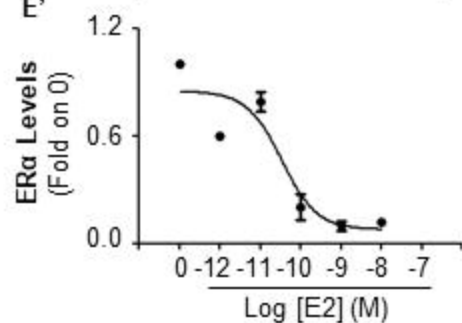

# Figure 3

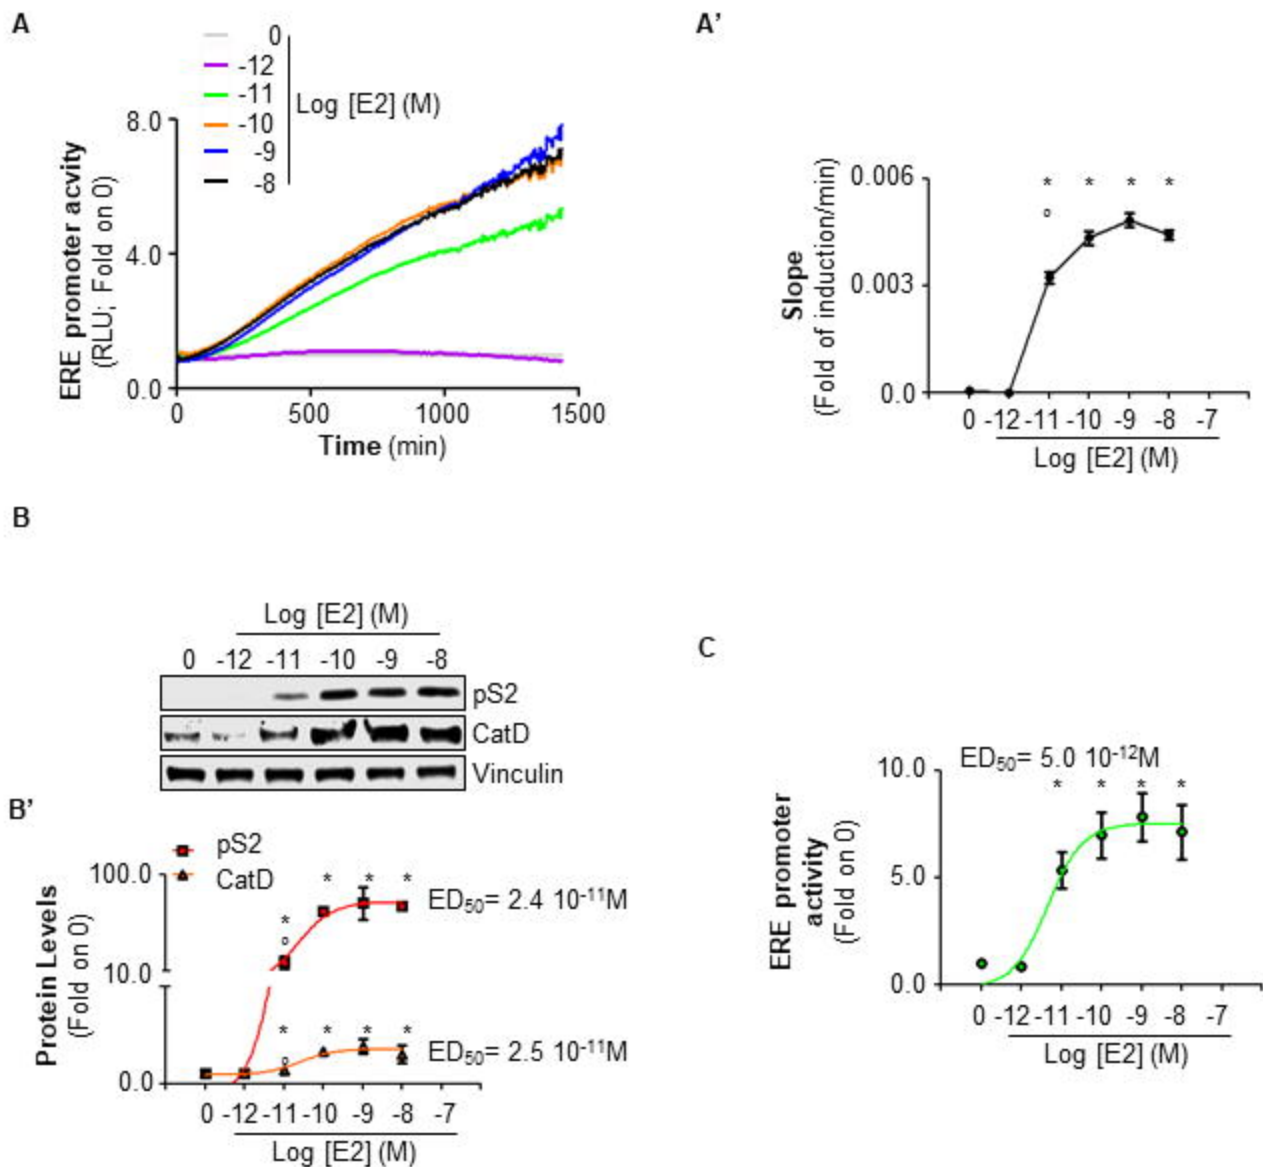

# Figure 4

A

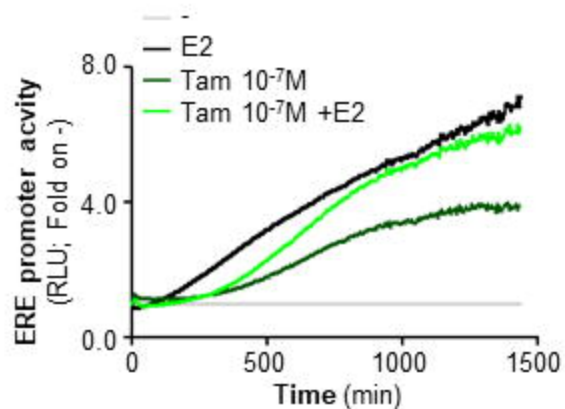

B

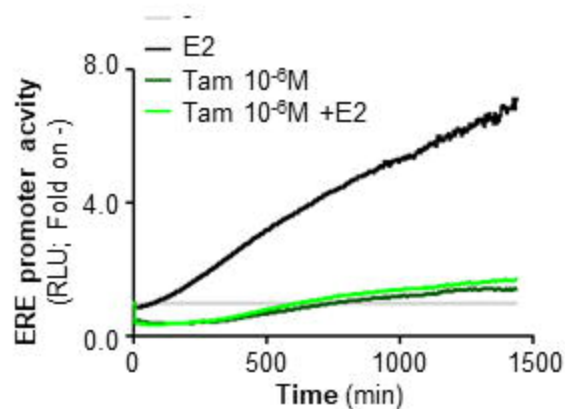

C

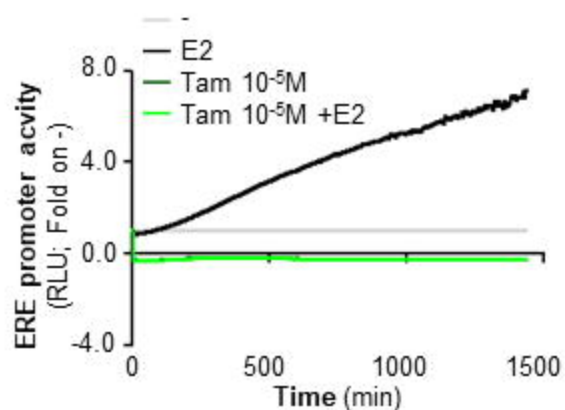

D

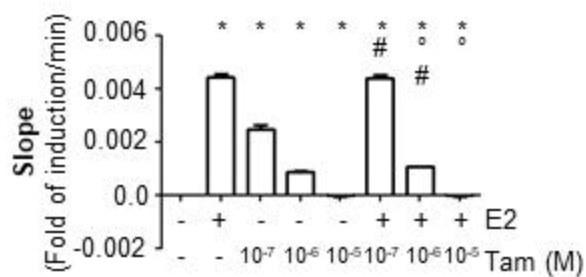

E

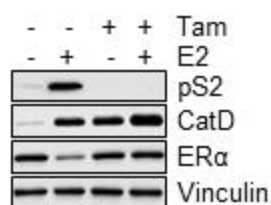

E'

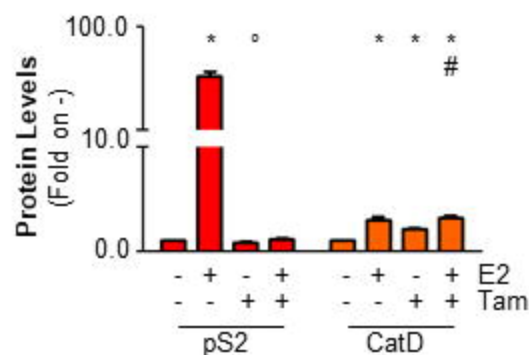

# Figure 5

A

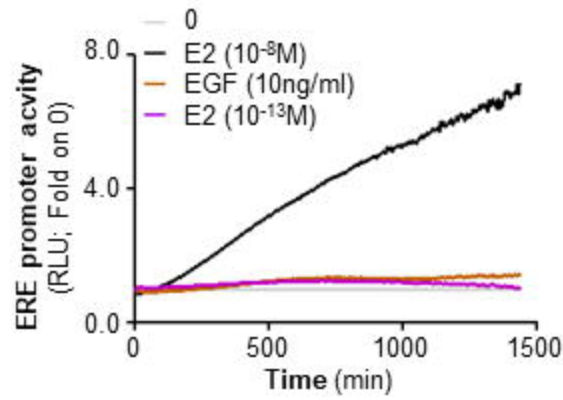

B

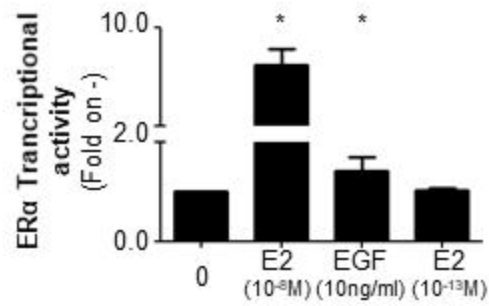

C

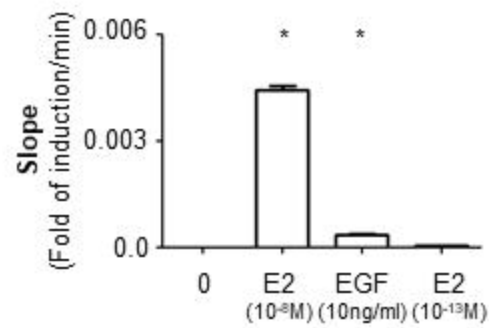



# Figure 6

A

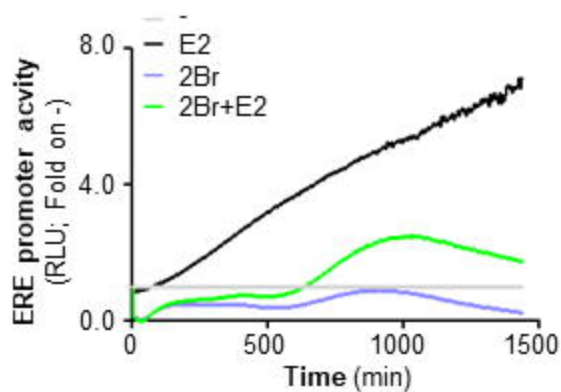

D

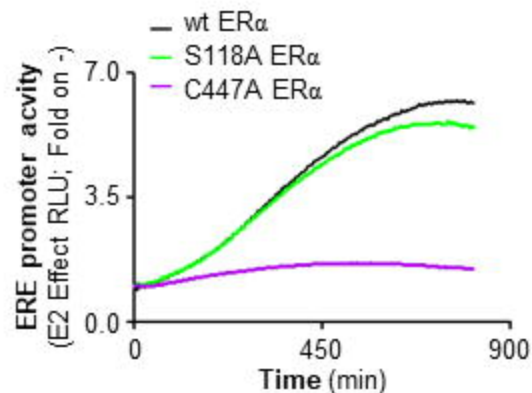

B

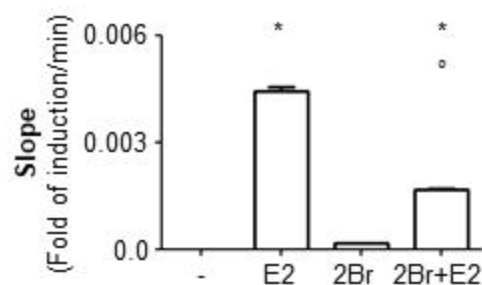

E

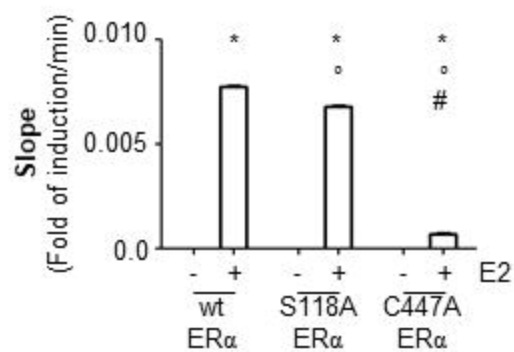

C

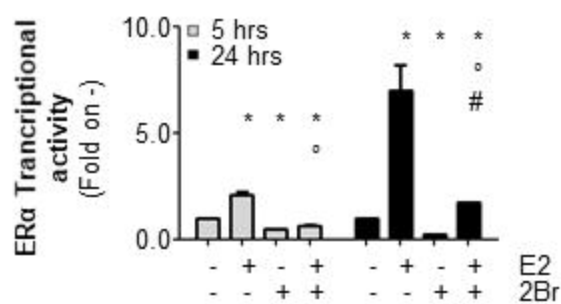

F

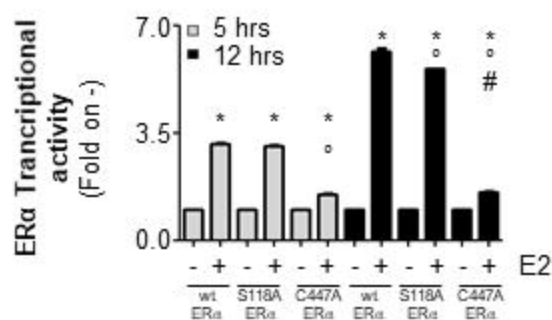

# Figure 7

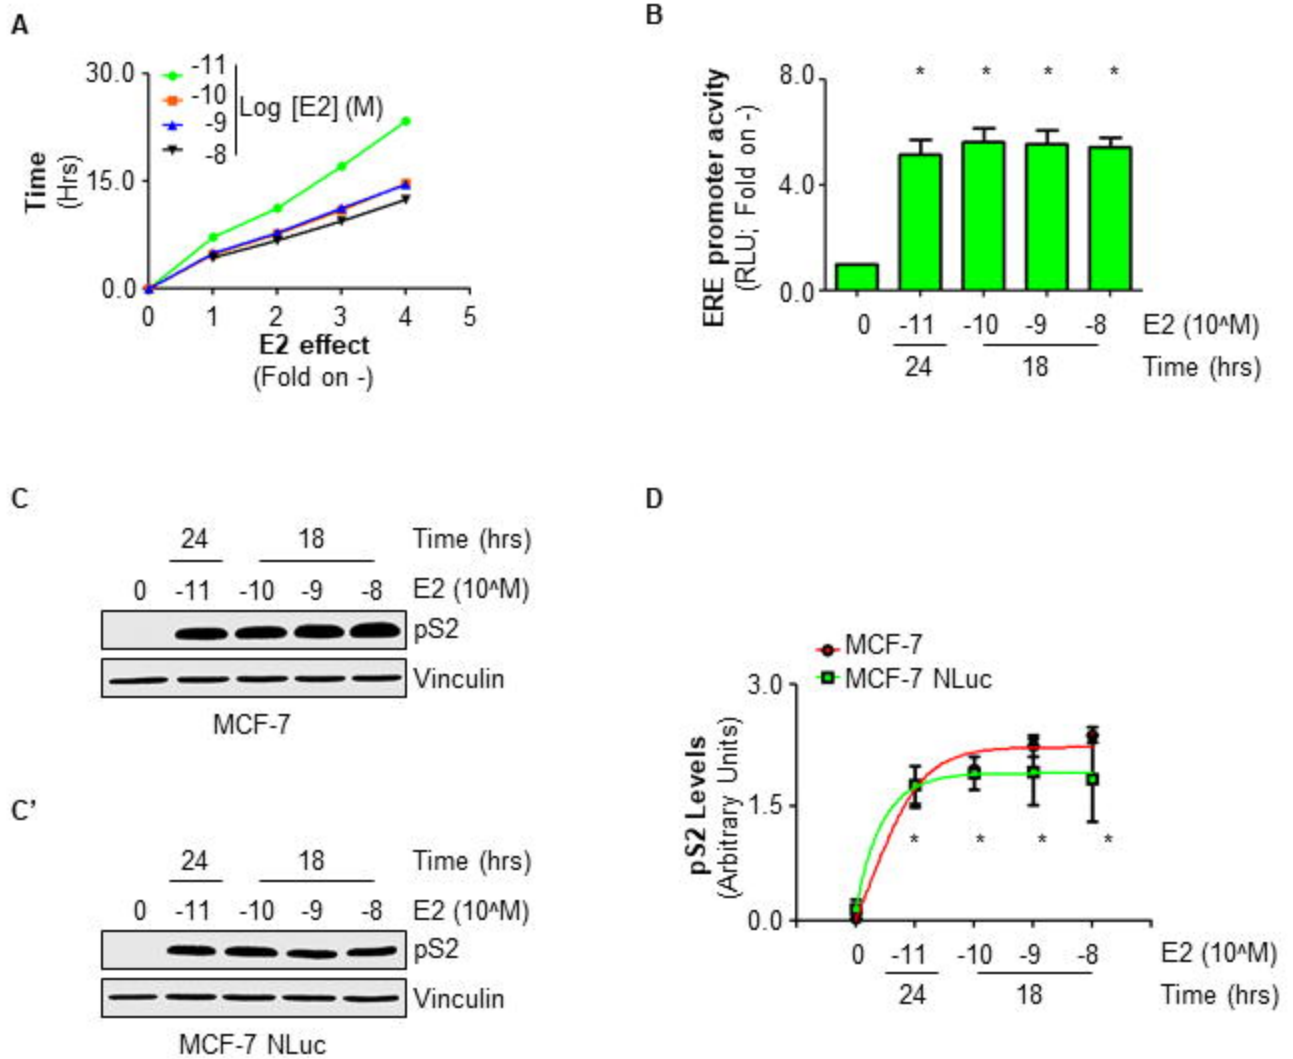

Source: https://www.biorxiv.org/content/10.1101/844761v2.full.pdf
